# Supplementary material for: Adoption of Durum Wheat Cultivar ‘Salim’ with a Technical Package and Its Resilience to Climate Change Impacts in Smallholders: Case of Nebeur/Kef Region, Tunisia
Source: MDPI journal article supplement (doi:10.3390/plants10112379), 2021-11-05
Supplement: s1 [file s1]

## Supplementary Materials

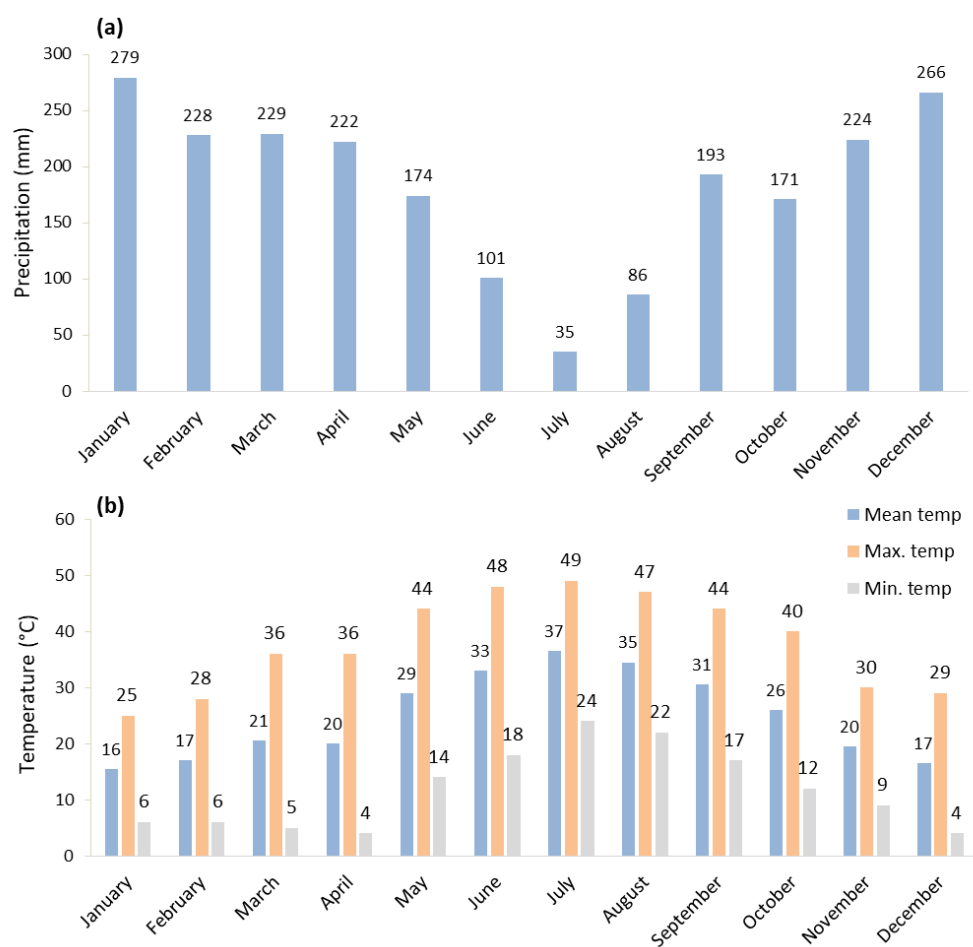

Figure S1. Monthly **precipitation** (a) and temperature (b) recorded in Nebeur/Kef site during 1992-2019.

**Table S1.** Quantification of on-farm yield gap for all farmers.

| Farmers |           | Yield gap (q ha <sup>-1</sup> ) |         |
|---------|-----------|---------------------------------|---------|
|         |           | 2013/14                         | 2014/15 |
| 1       | Leader    | 12                              | 12      |
| 2       | Satellite | 10                              | 9       |
| 3       | Satellite | 13                              | 11      |
| 4       | Satellite | 15                              | 14      |
| 5       | Satellite | 16                              | 15      |
| 6       | Satellite | 15                              | 12      |
| 7       | Satellite | 13                              | 12      |
| 8       | Satellite | 14                              | 13      |
| 9       | Satellite | 14                              | 13      |
| 10      | Satellite | 15                              | 12      |
| 11      | Satellite | 15                              | 13      |
| Mean    |           | 13.8                            | 12.3    |

**Table S2.** Characteristics of selected durum wheat cultivars, 'Salim' and 'Karim'.

| Parameters                             | Salim                                                                             | Karim                                               |
|----------------------------------------|-----------------------------------------------------------------------------------|-----------------------------------------------------|
| Seed                                   | Certified                                                                         | Certified                                           |
| Degree day emergence (°C-days)         | 122                                                                               | 117                                                 |
| Specific leaf area (cm <sup>2</sup> )  | 27                                                                                | 24                                                  |
| GDD (°C day from planting to heading)  | 1223.85                                                                           | 1208.10                                             |
| Mean Evatranspiration                  | Penman Montieth                                                                   |                                                     |
| Salinity tolerance exponent            | 0.9                                                                               | 1.48                                                |
| Phenologic sensitivity to water stress | 0.97                                                                              | 1.01                                                |
| Susceptibility to diseases             | More resistant to powdery mildew, rust (brown and yellow) and septoria than Karim | Susceptible to disease mainly septoria, rusts, etc. |
| Unstressed harvest index               | 0.28                                                                              | 0.36                                                |
| Productivity                           | Very productive                                                                   | Productive                                          |
| Thousand kernel weight (g)             | 40-48                                                                             | 40-45                                               |
